# Supplementary material for: Amine-functionalized polymer membrane for the electrochemical reduction of CO2 to hydrocarbons
Source: Royal Society of Chemistry journal article supplement (doi:10.1039/d4se00896k), 2024-01-01
Supplement: d4se00896k1.pdf [file d4se00896k1.pdf]

Supporting Information for:

**Amine Functionalized Polymer Membrane for  
Electrochemical Reduction of CO<sub>2</sub> to Hydrocarbons**

**Abhishek Kumar<sup>a</sup>, Leela Manohar Aeshala<sup>b\*</sup>, Tapas Palai<sup>a\*</sup>,**

<sup>a</sup> Department of Chemical Engineering, National Institute of Technology Hamirpur,

Hamirpur, Himachal Pradesh-177005, India

<sup>b</sup> Department of Chemical Engineering, National Institute of Technology Warangal,  
Warangal, Telangana - 506004, India

\*Corresponding author

Email: L.M. Aeshala ([leela.manohar@nitw.ac.in](mailto:leela.manohar@nitw.ac.in)) & T. Palai ([tapas@nith.ac.in](mailto:tapas@nith.ac.in))





## Evaluation of the product

The standard gas mixes of H<sub>2</sub>, CO, CH<sub>4</sub>, C<sub>2</sub>H<sub>4</sub>, C<sub>2</sub>H<sub>6</sub>, and CO<sub>2</sub> with varying concentrations were purchased from Ultra-pure Gases, India. These cylinders had a volume of 0.5 liters and were pressurized to 20 kg•cm<sup>-2</sup>. These mixtures were used for the detection and calibration of gaseous samples (Supplementary Table S1). CO<sub>2</sub> has been taken as a percentage level due to the fact that the gas product stream contains a large amount of CO<sub>2</sub>, and it does not impact any of the other gaseous peaks except for CO<sub>2</sub> while doing an analysis of gaseous compounds. Merck was the supplier for all the GC grade alcohols (methanol, ethanol, propanol, and butanol), as well as formic acid and formaldehyde. All the samples were utilised without any additional purification steps being taken, unless otherwise specified. In order to facilitate the injection of samples, gas and liquid syringes were obtained from Hamilton. The gas chromatograph was used to conduct an analysis on the products that were collected following the ERCO<sub>2</sub> process. In the case of gas sample studies, the samples were run through a Carbosieve S-II (3.05 m, 1/8 in., 2.1 mm) column, which was linked in series with a methanizer, a flame ionisation detector (FID) and a thermal conductivity detector (TCD). TCD was used to detect the gases H<sub>2</sub> and CO<sub>2</sub>. however, FID was used to identify CO (after going through the methanizer) along with hydrocarbons such as CH<sub>4</sub>, C<sub>2</sub>H<sub>4</sub>, and C<sub>2</sub>H<sub>6</sub>. While hydrogen and oxygen were employed to ignite the flame, argon was utilised in the process as the mobile phase (carrier gas). The presence of flame is necessary for the proper operation of a flame ionisation detector. In the instance of liquid analysis, samples were analysed by running them through a Porapak Q (SS column of 1/8" OD x 2 m, 80/100 mesh) column that was linked to FID. This allowed for the identification of alcohols (C1-C4). If liquid product analysis was performed, hydrogen was utilised both as a carrier gas and for flame ignition.

**Supplementary Table S1:** Standard samples for the calibration purpose in GC.

| <b>Standard gas mixtures</b>        |    |     |     |      |
|-------------------------------------|----|-----|-----|------|
| Gas (amount)                        | 1  | 2   | 3   | 4    |
| H <sub>2</sub> (%)                  | 1  | 5   | 10  | 15   |
| CH <sub>4</sub> (ppm)               | 10 | 50  | 500 | 1000 |
| CO (ppm)                            | 10 | 50  | 500 | 1000 |
| C <sub>2</sub> H <sub>4</sub> (ppm) | 10 | 50  | 500 | 1000 |
| C <sub>2</sub> H <sub>6</sub> (ppm) | 10 | 50  | 500 | 1000 |
| CO <sub>2</sub> (balance)           | 99 | 95  | 90  | 85   |
| <b>Standard liquid sample</b>       |    |     |     |      |
| Methanol (ppm)                      | 50 | 100 | 500 | 1000 |
| Ethanol (ppm)                       | 50 | 100 | 500 | 1000 |
| Propanol (ppm)                      | 50 | 100 | 500 | 1000 |
| Butanol (ppm)                       | 50 | 100 | 500 | 1000 |
